# Supplementary material for: Evaluation of Durability as a Function of Fabric Strength and Residual Bio-Efficacy for the Olyset Plus and Interceptor G2 LLINs after 3 Years of Field Use in Tanzania
Source: MDPI journal article supplement (doi:10.3390/tropicalmed8080379), 2023-07-25
Supplement: s1 [file s1]

Table S1: Measures of association between net treatments and mortality for susceptible *An. gambiae* Kisumu in cone bioassays

| Reference LLIN         | Candidate LLIN         | AOR (95% CI)            | p-Value |
|------------------------|------------------------|-------------------------|---------|
| Untreated 0x           | Untreated 20x          | 0.29 (0.09 – 0.89)      | 0.031   |
| Untreated 0x           | IG2 36m                | 20.89 (7.72 – 56.50)    | <0.001  |
| Untreated 0x           | Unused IG2 20x         | 11.91 (4.59 – 30.87)    | <0.001  |
| Untreated 0x           | Unused IG2 0x          | 9.96 (3.88 – 25.62)     | <0.001  |
| Untreated 0x           | Unused Olyset Plus 0x  | 59.69 (18.52 – 192.32)  | <0.001  |
| Untreated 0x           | Unused Olyset Plus 20x | 5.28 (2.08 – 13.36)     | <0.001  |
| Untreated 0x           | Olyset Plus 36 months  | 5.28 (2.08 – 13.36)     | <0.001  |
| Untreated 20x          | IG2 36m                | 71.83 (27.71 – 186.20)  | <0.001  |
| Untreated 20x          | Unused IG2 20x         | 40.94 (16.51 – 101.52)  | <0.001  |
| Untreated 20x          | Unused IG2 0x          | 34.26 (13.94 – 84.22)   | <0.001  |
| Untreated 20x          | Unused Olyset Plus 0x  | 205.26 (66.03 – 638.04) | <0.001  |
| Untreated 20x          | Unused Olyset Plus 20x | 18.14 (7.50 – 43.89)    | <0.001  |
| Untreated 20x          | Olyset Plus 36 months  | 18.14 (7.50 – 43.89)    | <0.001  |
| IG2 36m                | Unused IG2 20x         | 0.57 (0.27 – 1.20)      | 0.138   |
| IG2 36m                | Unused IG2 0x          | 0.48 (0.23 – 0.99)      | 0.048   |
| IG2 36m                | Unused Olyset Plus 0x  | 2.86 (1.05 – 7.81)      | 0.041   |
| IG2 36m                | Unused Olyset Plus 20x | 0.25 (0.12 – 0.52)      | <0.001  |
| IG2 36m                | Olyset Plus 36 months  | 0.25 (0.12 – 0.52)      | <0.001  |
| Unused IG2 20x         | Unused IG2 0x          | 0.84 (0.43 – 1.65)      | 0.606   |
| Unused IG2 20x         | Unused Olyset Plus 0x  | 5.01 (1.91 – 13.15)     | 0.001   |
| Unused IG2 20x         | Unused Olyset Plus 20x | 0.44 (0.23 – 0.85)      | 0.015   |
| Unused IG2 20x         | Olyset Plus 36 months  | 0.44 (0.23 – 0.85)      | 0.015   |
| Unused IG2 0x          | Unused Olyset Plus 0x  | 5.99 (2.30 – 15.59)     | <0.001  |
| Unused IG2 0x          | Unused Olyset Plus 20x | 0.52 (0.28 – 1.01)      | 0.053   |
| Unused IG2 0x          | Olyset Plus 36 months  | 0.52 (0.28 – 1.01)      | 0.053   |
| Unused Olyset Plus 0x  | Unused Olyset Plus 20x | 0.09 (0.03 – 0.23)      | <0.001  |
| Unused Olyset Plus 0x  | Olyset Plus 36 months  | 0.09 (0.03 – 0.23)      | <0.001  |
| Unused Olyset Plus 20x | Olyset Plus 36 months  | 1.00 (0.54 – 1.87)      | 1.000   |

Table S2: Measures of association between net treatments and mortality for pyrethroid resistant *An. gambiae* Muleba-kis in cone bioassays

| Reference LLIN         | Candidate LLIN         | AOR (95% CI)              | p-Value |
|------------------------|------------------------|---------------------------|---------|
| Untreated 0x           | Untreated 20x          | 0.37 (0.11 – 1.28)        | 0.116   |
| Untreated 0x           | IG2 36m                | 1.62 (0.54 – 4.83)        | 0.389   |
| Untreated 0x           | Unused IG2 20x         | 1.49 (0.49 – 4.48)        | 0.480   |
| Untreated 0x           | Unused IG2 0x          | 5.49 (1.94 – 15.52)       | 0.001   |
| Untreated 0x           | Unused Olyset Plus 0x  | 279.84 (51.54 – 1519.49)  | <0.001  |
| Untreated 0x           | Unused Olyset Plus 20x | 1.00 (0.32 – 3.16)        | 1.000   |
| Untreated 0x           | Olyset Plus 36 months  | 12.50 (4.39 – 35.56)      | <0.001  |
| Untreated 20x          | IG2 36m                | 4.40 (1.63 – 11.92)       | 0.004   |
| Untreated 20x          | Unused IG2 20x         | 4.05 (1.48 – 11.04)       | 0.006   |
| Untreated 20x          | Unused IG2 0x          | 14.95 (5.87 – 38.06)      | <0.001  |
| Untreated 20x          | Unused Olyset Plus 0x  | 761.26 (149.08 – 3887.37) | <0.001  |
| Untreated 20x          | Unused Olyset Plus 20x | 2.72 (0.95 – 7.82)        | 0.063   |
| Untreated 20x          | Olyset Plus 36 months  | 33.99 (13.24 – 87.28)     | <0.001  |
| IG2 36m                | Unused IG2 20x         | 0.92 (0.41 – 2.06)        | 0.837   |
| IG2 36m                | Unused IG2 0x          | 3.40 (1.66 – 6.95)        | 0.001   |
| IG2 36m                | Unused Olyset Plus 0x  | 172.91 (37.99 – 787.06)   | <0.001  |
| IG2 36m                | Unused Olyset Plus 20x | 0.62 (0.26 – 1.48)        | 0.278   |
| IG2 36m                | Olyset Plus 36 months  | 7.72 (3.73 – 15.98)       | <0.001  |
| Unused IG2 20x         | Unused IG2 0x          | 3.69 (1.78 – 7.66)        | <0.001  |
| Unused IG2 20x         | Unused Olyset Plus 0x  | 188.18 (41.10 – 861.57)   | <0.001  |
| Unused IG2 20x         | Unused Olyset Plus 20x | 0.67 (0.28 – 1.62)        | 0.377   |
| Unused IG2 20x         | Olyset Plus 36 months  | 8.40 (4.01 – 17.60)       | <0.001  |
| Unused IG2 0x          | Unused Olyset Plus 0x  | 50.93 (11.67 – 222.34)    | <0.001  |
| Unused IG2 0x          | Unused Olyset Plus 20x | 0.18 (0.08 – 0.40)        | <0.001  |
| Unused IG2 0x          | Olyset Plus 36 months  | 2.27 (1.20 – 4.30)        | 0.012   |
| Unused Olyset Plus 0x  | Unused Olyset Plus 20x | 0.00 (0.00 – 0.02)        | <0.001  |
| Unused Olyset Plus 0x  | Olyset Plus 36 months  | 0.04 (0.01 – 0.20)        | <0.001  |
| Unused Olyset Plus 20x | Olyset Plus 36 months  | 12.50 (5.57 – 28.04)      | <0.001  |

Table S3: Fabric strength results for the unwashed and washed Interceptor G2 and Olyset Plus LLINs

| Fabric Strength Test                                           |        | Net Type       |                                   |                                     |              |                                   |                                     | Relative Expand. Uncertainty (K=2) |
|----------------------------------------------------------------|--------|----------------|-----------------------------------|-------------------------------------|--------------|-----------------------------------|-------------------------------------|------------------------------------|
|                                                                |        | Interceptor G2 |                                   |                                     | Olyset Plus  |                                   |                                     |                                    |
|                                                                |        | New Unwashed   | New Washed at Laboratory 20 Times | 36 Months Old, Washed Several Times | New Unwashed | New Washed at Laboratory 20 Times | 36 Months Old, Washed Several Times |                                    |
| Mean bursting strength (kPa)                                   |        | 430            | 390                               | 376                                 | 330          | 340                               | 337                                 | 15%                                |
| Mean fabric weight (g/m <sup>2</sup> )                         |        | 47.2           | 45.8                              | 48.2                                | 38.7         | 44.3                              | 49.4                                | 3.2%                               |
| Modified, Grab method , with hooks: Mean tensile strengt h (N) | Length | 19             | 21                                | 18                                  | 19           | 25                                | 18                                  | N/A                                |
|                                                                | Width  | 24             | 26                                | 21                                  | 21           | 30                                | 23                                  |                                    |
| Grab method , Mean tensile strengt h (N)                       | Length | 224            | 210                               | 196                                 | 184          | 182                               | 160                                 | 16%                                |
|                                                                | Width  | 148            | 132                               | 95.4                                | 92.4         | 87.6                              | 90.8                                |                                    |
| Mean mesh size (holes/cm <sup>2</sup> )                        |        | 31             | 29                                | 30                                  | 16           | 21                                | 22                                  | N/A                                |
| Tear strengt h, (N)                                            | Length | 17             | 13.8                              | 14.1                                | 9.9          | 13.6                              | 7.5                                 | 12%                                |
|                                                                | Width  | 15             | 19                                | 6.9                                 | 5.0          | 21.4                              | 10                                  |                                    |

Values given represent a mean of five tests (from 5 samples) per net. N = Newton (standard unit of force)
